# Supplementary material for: Understanding Defense-Initiated Victim Outreach and Why It Is Essential in Defending a Capital Client
Source: Royal Society of Chemistry journal article supplement (doi:10.1039/d4ra01710b), 2008-01-01
Supplement: d4ra01710b1.pdf [file d4ra01710b1.pdf]

## Probing capping mechanisms and polymer matrix loading of biogenic vaterite CaCO<sub>3</sub>-Ag hybrid through X-ray photoelectron spectroscopy (XPS)

Mohammad Hossein Azarian<sup>1</sup>, Supinya Nijpanich<sup>2</sup>, Narong Chanlek<sup>2</sup>, Wimonlak Sutapun<sup>1,3\*</sup>

<sup>1</sup> Research centre for Biocomposite Materials for Medical, Agricultural and Food Industry, Suranaree University of Technology, Nakhon Ratchasima, 30000, Thailand

<sup>2</sup> Synchrotron Light Research Institute (Public Organization), 111 University Avenue, Muang District, Nakhon Ratchasima 30000, Thailand

<sup>3</sup>School of Polymer Engineering, Suranaree University of Technology, Nakhon Ratchasima, 30000, Thailand

\*Corresponding Author Email: [wimonlak@sut.ac.th](mailto:wimonlak@sut.ac.th)

### Supplementary file

#### Atomic concentration determination

To determine the relative concentrations of constituents on the sample surface, the peak area and peak height sensitivity factors were utilized. For homogeneous sample, the number of photoelectrons per second in a specific spectra peak is given by:

$$I = nf\sigma\lambda\theta\gamma AT$$

where  $n$  is the number of atoms of the element per cm<sup>3</sup> of the sample,  $f$  is the x-ray flux in photons/cm<sup>2</sup>-sec,  $\sigma$  is the photoelectric cross-section for the atomic orbital of interest in cm<sup>2</sup>,  $\theta$  is an angular efficiency factor for the instrumental arrangement based on the angle between the photon path and detected electron,  $\gamma$  is the efficiency in the photoelectric process for formation of photoelectrons of the normal photoelectron energy,  $\lambda$  is the mean free path of the

photoelectrons in the sample, A is the area of the sample from which photoelectrons are detected, and T is the detection efficiency for electrons emitted from the sample.

For our work, the atomic concentration of each element was calculated using the following equation.

$$\text{Atomic Concentration} = \frac{\frac{I_x}{S_x \times T_x}}{\sum_{i=1}^n \frac{I_i}{S_i \times T_i}} \times 100$$

where I is intensity or area pea, S is sensitivity factor (SF), and T is time per second. The relative sensitivity factor (RSF) and corrected values according to the machine of each sample are shown in the following table.

|                  | C1s    | N1s   | O1s    | Na1s    | Cl2p    | Ca2p    | Ag3d    |
|------------------|--------|-------|--------|---------|---------|---------|---------|
| RSF              | 0.314  | 0.499 | 0.733  | 1.102   | 0.954   | 1.927   | 6.277   |
| Corrected<br>RSF | 36.823 | 58.53 | 85.994 | 129.358 | 126.513 | 250.487 | 833.710 |

**Table S1.** The relative sensitivity factor (RSF) and corrected values

### Scanning Electron Microscopy

The morphology and size of vaterite CaCO<sub>3</sub>-Ag microspheres were observed through a field emission scanning electron microscope (FE-SEM) (JEOL JSM 7800F Tokyo, Japan) coupled with energy-dispersive X-ray spectroscopy (EDX). The samples were coated with gold before SEM measurements. The statistical image processing was performed in three stages: (1) the microsphere dimensions were measured through Digi Mizer software (Media Cybernetics, Rockville, MD), (2) size distribution (PSD) determination using software Minitab 17.2.0 (Minitab Ltd., Coventry, U.K.) to obtain the mean diameter (D<sub>m</sub>) and their respective histograms, and (3) the elemental composition of the vaterite CaCO<sub>3</sub>-Ag microspheres by ESX in the mapping mode.

### **ICP-OES**

The release of AgNPs in both closed-like and open-like systems was investigated under slightly acidic pH (pH 6, acetate buffer). In the closed-like conditions, the samples were incubated in the corresponding buffer solutions at 37 °C with a concentration of 2 mg/mL. At various time intervals (1, 6, 12, 24, and 48 h), an aliquot equal to 5% of the volume was collected for silver quantification using ICP-OES. The collected aliquots were then replaced with an equal volume of fresh buffer to maintain the same final volume. In the open-like conditions, both films and powders were incubated in the respective buffer at 37 °C with a concentration of 2 mg/mL. Like the closed-like conditions, at various time intervals (1, 6, 12, 24, and 48 h), an aliquot equal to 75% of the total volume was collected for silver quantification using ICP-OES. The collected aliquots were replaced with an equivalent amount of fresh buffer to maintain the final volume. All experiments were carried out in triplicate.

### **BET Analysis**

The Brunauer, Emmett, and Teller (BET) surface area measurements and porosity analysis were carried out by Micromeritics 3Flex BET analyser. All samples were degassed at 40 °C for 24 h in a vacuum before the examination.

## Morphology

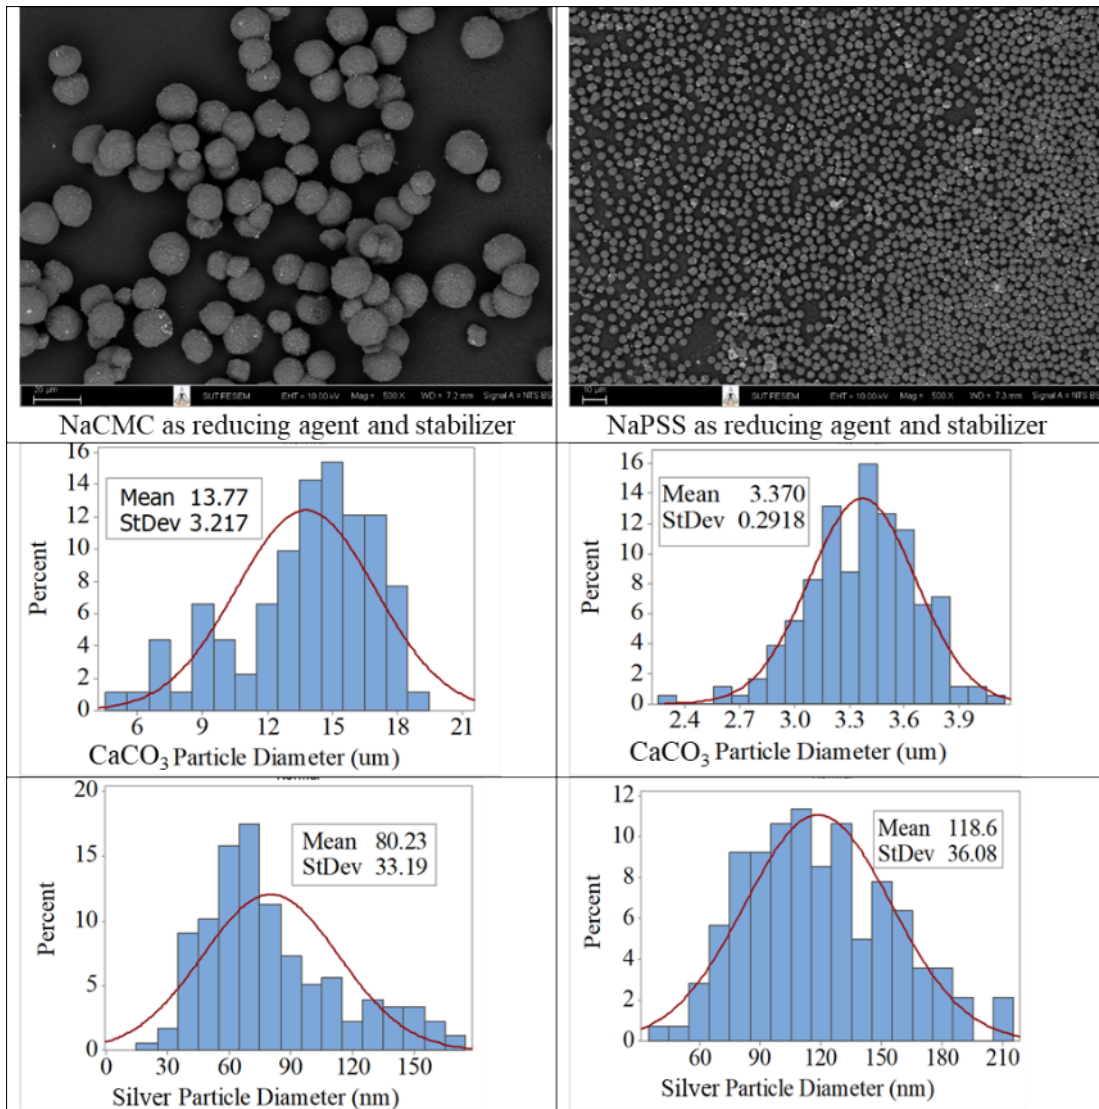

**Figure S1.** SEM images of CaCO<sub>3</sub>-Ag-CMC and CaCO<sub>3</sub>-Ag-PSS (500x magnification). Histogram of CaCO<sub>3</sub> microparticles, AgNPs and their size distribution.

**Table S2.** Table summarizing XPS data analysis results.

|                                | Region          | Binding energy (eV) | FWHM (eV) | Height | Area |
|--------------------------------|-----------------|---------------------|-----------|--------|------|
| <b>ESP</b>                     | C1s             | 281.20              | 2.00      | 157    | 367  |
|                                |                 | 283.44              | 2.00      | 327    | 762  |
|                                |                 | 284.80              | 2.00      | 535    | 1248 |
|                                |                 | 287.48              | 2.00      | 229    | 533  |
|                                |                 | 289.07              | 1.66      | 521    | 1006 |
|                                | O1s             | 529.21              | 1.80      | 1000   | 2099 |
|                                |                 | 530.97              | 1.80      | 3642   | 7642 |
|                                |                 | 532.58              | 1.80      | 177    | 3.67 |
|                                | Ca2p            | 346.34              | 2.18      | 2106   | 5444 |
|                                |                 | 349.94              | 2.25      | 1040   | 2722 |
| N1s                            | 399.28          | 2.01                | 78        | 182    |      |
| <b>CaCO<sub>3</sub>-Ag-CMC</b> | C1s             | 282.34              | 2.00      | 492    | 1148 |
|                                |                 | 284.00              | 1.90      | 665    | 1474 |
|                                |                 | 286.33              | 1.56      | 407    | 742  |
|                                |                 | 287.62              | 1.93      | 235    | 530  |
|                                |                 | 289.54              | 1.79      | 457    | 957  |
|                                | O1s             | 529.87              | 1.80      | 70     | 1485 |
|                                |                 | 531.7               | 1.82      | 3157   | 6607 |
|                                |                 | 533.08              | 1.80      | 943    | 1998 |
|                                | Ca2p            | 347.06              | 2.18      | 1692   | 4268 |
|                                |                 | 350.66              | 2.24      | 817    | 2134 |
|                                | Ag3d            | 367.80              | 2.09      | 169    | 410  |
|                                |                 | 368.84              | 2.03      | 128    | 303  |
|                                |                 | 373.80              | 2.07      | 119    | 287  |
|                                |                 | 374.84              | 1.90      | 96     | 212  |
| <b>CaCO<sub>3</sub>-Ag-PSS</b> | C1s             | 282.78              | 2.00      | 657    | 1531 |
|                                |                 | 284.80              | 2.00      | 1038   | 2419 |
|                                |                 | 286.6               | 2.00      | 312    | 727  |
|                                |                 | 189.86              | 2.10      | 273    | 667  |
|                                | O1s             | 529.80              | 1.80      | 623    | 1307 |
|                                |                 | 531.54              | 1.80      | 2545   | 5340 |
|                                |                 | 532.58              | 1.91      | 1067   | 2379 |
|                                | Ca2p            | 347.29              | 1.96      | 1423   | 3275 |
|                                |                 | 350.89              | 2.16      | 649    | 1637 |
|                                | Ag3d            | 367.80              | 1.90      | 145    | 321  |
|                                |                 | 368.99              | 1.80      | 204    | 427  |
|                                |                 | 373.80              | 2.00      | 96     | 225  |
|                                |                 | 374.99              | 1.76      | 146    | 299  |
|                                | <b>Neat CMC</b> | C1s                 | 284.80    | 1.14   | 548  |
| 286.29                         |                 |                     | 1.34      | 4388   | 6879 |
| 287.73                         |                 |                     | 1.23      | 697    | 1002 |
|                                |                 |                     | 530.93    | 1.38   | 987  |

|                                    |        |         |      |      |       |
|------------------------------------|--------|---------|------|------|-------|
|                                    | O1s    | 532.72  | 1.52 | 5782 | 10215 |
|                                    |        | 535.52  | 1.60 | 129  | 241   |
|                                    | Na1s   | 1071    | 1.65 | 571  | 1094  |
| <b>CMC/CaCO<sub>3</sub>-Ag-CMC</b> | C1s    | 284.80  | 1.40 | 1607 | 2624  |
|                                    |        | 286.33  | 1.40 | 2097 | 3432  |
|                                    |        | 287.91  | 1.87 | 300  | 652   |
|                                    | O1s    | 530.96  | 1.53 | 439  | 788   |
|                                    |        | 532.69  | 1.70 | 2710 | 5371  |
|                                    | Ca2p   | 346.84  | 1.37 | 192  | 306   |
|                                    |        | 347.71  | 1.58 | 126  | 236   |
|                                    |        | 350.44  | 1.37 | 96   | 153   |
|                                    |        | 351.31  | 1.94 | 52   | 118   |
|                                    | Ag3d   | 367.57  | 1.52 | 157  | 278   |
|                                    |        | 373.57  | 2.00 | 84   | 195   |
|                                    | Na1s   | 1071.73 | 1.80 | 106  | 222   |
|                                    |        | 1073.63 | 1.75 | 104  | 211   |
|                                    | Cl2p   | 198.24  | 1.70 | 78   | 154   |
| 199.83                             |        | 1.36    | 49   | 77   |       |
| 200.56                             |        | 1.58    | 142  | 262  |       |
| 202.15                             |        | 1.53    | 73   | 131  |       |
| <b>CMC/CaCO<sub>3</sub>-Ag-PSS</b> | C1s    | 284.80  | 1.29 | 3323 | 5007  |
|                                    |        | 286.42  | 1.19 | 1883 | 2610  |
|                                    |        | 288.25  | 1.57 | 269  | 493   |
|                                    | O1s    | 531.28  | 1.39 | 644  | 1041  |
|                                    |        | 532.74  | 1.59 | 2245 | 4115  |
|                                    | Ca2p   | 346.84  | 1.39 | 147  | 237   |
|                                    |        | 347.68  | 1.30 | 164  | 248   |
|                                    |        | 350.44  | 1.11 | 92   | 119   |
|                                    |        | 351.28  | 0.88 | 121  | 124   |
|                                    | Ag3d   | 367.95  | 1.50 | 144  | 252   |
|                                    |        | 373.95  | 1.51 | 101  | 177   |
| Cl2p                               | 198.73 | 2.58    | 58   | 176  |       |
|                                    | 200.32 | 2.26    | 33   | 88   |       |
| <b>Neat PVA</b>                    | C1s    | 284.80  | 1.70 | 1449 | 2807  |
|                                    |        | 286.33  | 1.80 | 1412 | 2963  |
|                                    | O1s    | 532.46  | 1.82 | 3328 | 7063  |
| <b>PVA/CaCO<sub>3</sub>-Ag-CMC</b> | C1s    | 284.80  | 1.77 | 3373 | 6814  |
|                                    |        | 288.49  | 1.42 | 143  | 238   |
|                                    | O1s    | 531.31  | 1.80 | 516  | 1110  |
|                                    |        | 532.09  | 1.80 | 446  | 936   |
|                                    | Ca2p   | 347.23  | 1.83 | 298  | 637   |
|                                    |        | 350.83  | 2.01 | 136  | 318   |
|                                    | Ag3d   | 367.82  | 1.55 | 388  | 705   |
| 373.82                             |        | 1.51    | 279  | 493  |       |
| <b>PVA/CaCO<sub>3</sub>-Ag-PSS</b> | C1s    | 284.80  | 1.81 | 2995 | 6319  |
|                                    |        | 288.04  | 20.1 | 111  | 2.94  |
|                                    | O1s    | 531.18  | 1.75 | 597  | 1217  |
|                                    |        | 532.22  | 1.82 | 468  | 1004  |
|                                    | Ca2p   | 347.28  | 1.91 | 331  | 736   |
|                                    |        | 350.88  | 2.05 | 154  | 368   |

|  |      |        |      |     |     |
|--|------|--------|------|-----|-----|
|  | Ag3d | 367.80 | 1.86 | 243 | 527 |
|  |      | 373.80 | 1.74 | 182 | 369 |
